# Supplementary material for: CDDO-Me Attenuates Astroglial Autophagy via Nrf2-, ERK1/2-SP1- and Src-CK2-PTEN-PI3K/AKT-Mediated Signaling Pathways in the Hippocampus of Chronic Epilepsy Rats
Source: MDPI journal article supplement (doi:10.3390/antiox10050655), 2021-04-23
Supplement: s1 [file s1]

## Supplementary information

# CDDO-Me Attenuates Astroglial Autophagy via Nrf2-, ERK1/2-SP1- and Src-CK2-PTEN-PI3K/AKT-Mediated Signaling Pathways in the Hippocampus of Chronic Epilepsy Rats

Ji-Eun Kim<sup>1,2\*</sup> and Tae-Cheon Kang<sup>1,2\*</sup>

<sup>1</sup> Department of Anatomy and Neurobiology, College of Medicine, Hallym University, Chuncheon 24252, South Korea

<sup>2</sup> Institute of Epilepsy Research, College of Medicine, Hallym University, Chuncheon 24252, South Korea

\* Correspondence to: J. -E. Kim, Department of Anatomy and Neurobiology, College of Medicine, Hallym University, Chuncheon, Kangwon-Do 24252, South Korea; Tel: +82-33-248-2522; Fax: +82-33-248-2525; E-mail: jieunkim@hallym.ac.kr; and T. -C. Kang, Department of Anatomy and Neurobiology, College of Medicine, Hallym University, Chuncheon, Kangwon-Do 24252, South Korea; Tel: +82-33-248-2524; Fax: +82-33-248-2525; E-mail: tckang@hallym.ac.kr

**Supplementary Table S1.** Primary antibodies used in the present study. **Antibody**

| Antibody        | Host   | Manufacturer<br>(catalog number) | Dilution used              |
|-----------------|--------|----------------------------------|----------------------------|
| AKT             | Rabbit | Cell signaling (#9272)           | 1:1,000 (WB)<br>1:50 (IP)  |
| Bif-1           | Rabbit | Cell signaling (#4427)           | 1:1,000 (WB)               |
| CK2             | Mouse  | Millipore (#05-1431)             | 1:1,000 (WB)               |
| ERK1/2          | Rabbit | Biorbyt (orb160960)              | 1:1,000 (WB)               |
| GFAP            | Mouse  | Millipore (mab3402)              | 1:4,000 (IF)               |
| HSP25           | Rabbit | Enzo (ADI-SPA-801)               | 1:1,000 (WB)<br>1:500 (IF) |
| LAMP1           | Rabbit | Lifespan (LS-B580)               | 1:1,000 (WB)<br>1:200 (IF) |
| Nrf2            | Mouse  | Abcam (ab89443)                  | 1:1,000 (WB)<br>1:100 (IF) |
| p-AKT-S473      | Rabbit | Cell signaling (#4060)           | 1:1,000 (WB)               |
| p-CK2-Y255      | Rabbit | Invitrogen (#PA5-38831)          | 1:1,000 (WB)               |
| p-CK2-T360/S362 | Rabbit | Abcam (ab119410)                 | 1:1,000 (WB)               |
| p-ERK1/2        | Rabbit | Bioss (bs-3330R)                 | 1:1,000 (WB)               |
| p-PTEN          | Rabbit | Cell signaling (#9549)           | 1:1,000 (WB)               |
| p-Src-Y416      | Rabbit | Cell signaling (#6943)           | 1:1,000 (WB)               |
| PTEN            | Rabbit | Abcam (ab32199)                  | 1:10,000 (WB)              |
| Src             | Rabbit | Cell signaling (#2108)           | 1:1,000 (WB)               |
| β-actin         | Mouse  | Sigma (A5316)                    | 1:5,000 (WB)               |

IF, Immunofluorescence; WB, Western blot.

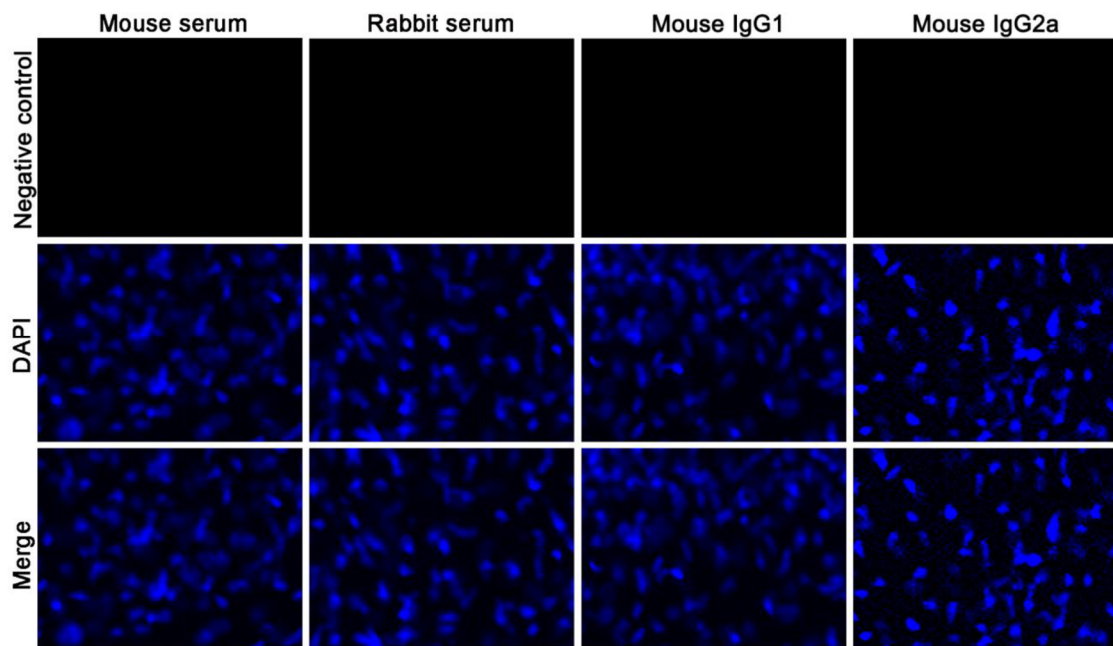

Supplementary Figure S1. Representative photos of negative control test.

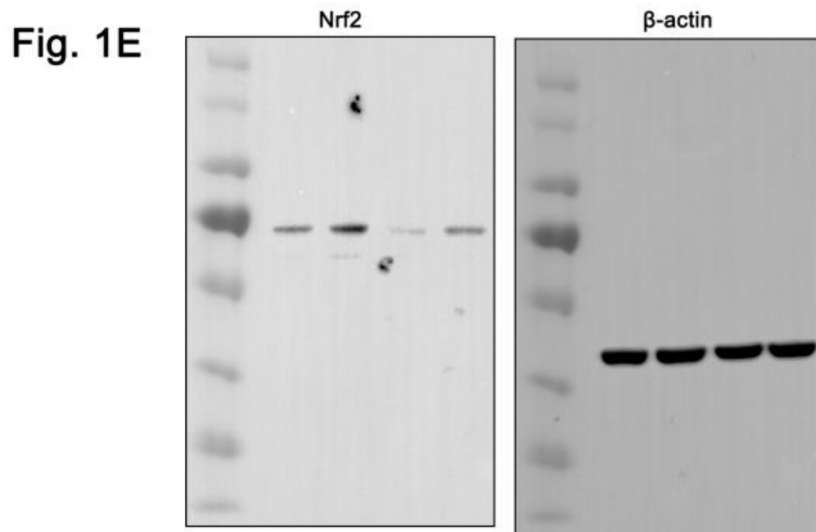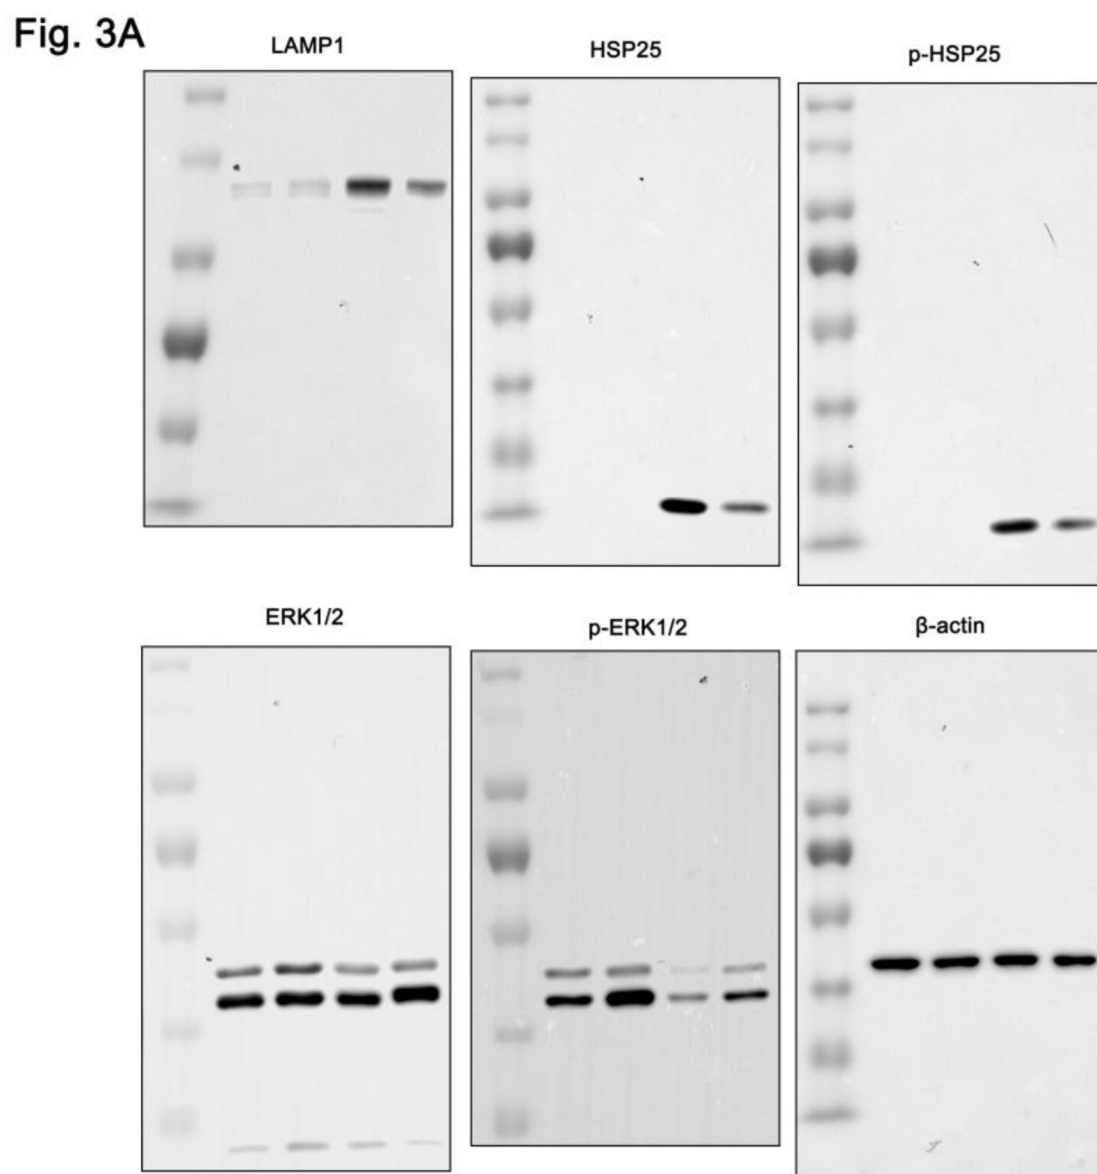

Supplementary Figure S2. Representative full-gel images of Western blots in Figure 1E and 3A.

**Fig. 4A**

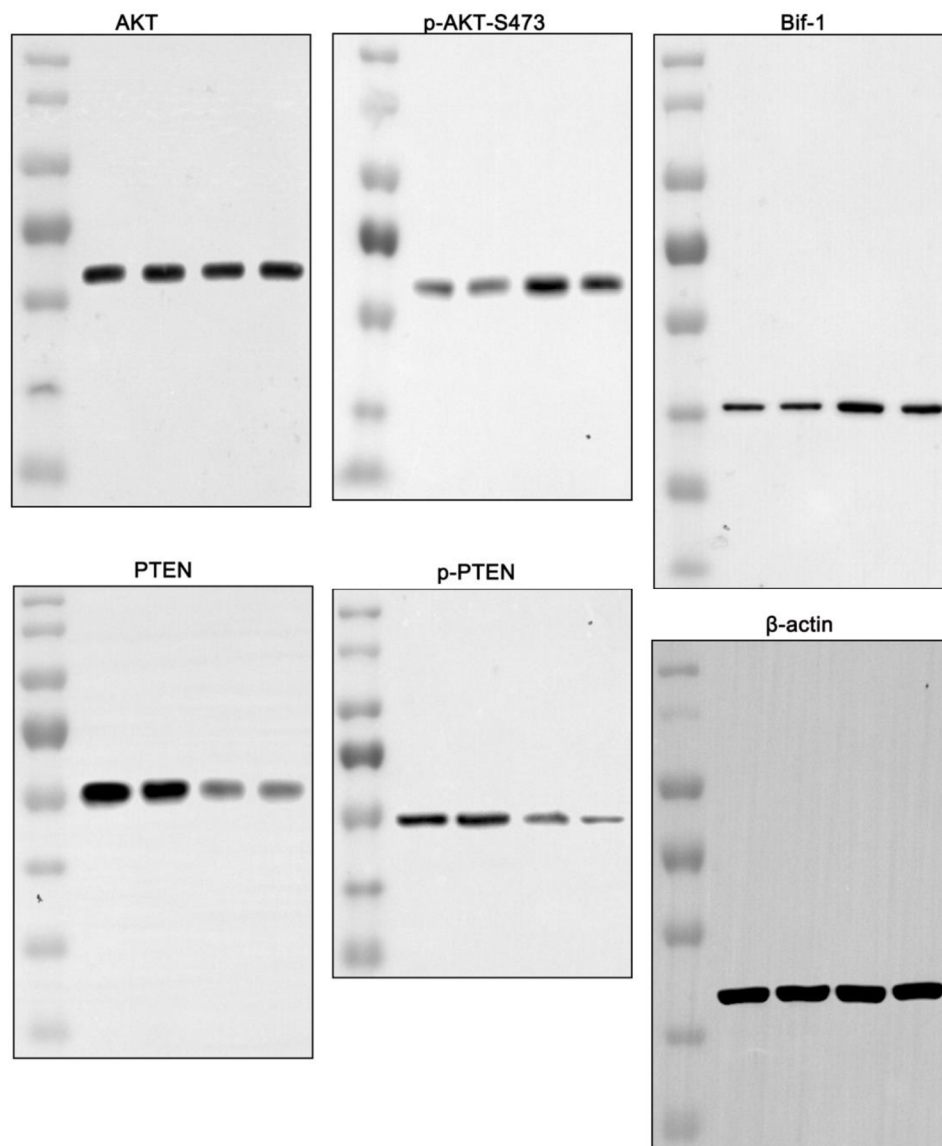

Supplementary Figure S3. Representative full-gel images of Western blots in Figure 4A.

**Fig. 5A**

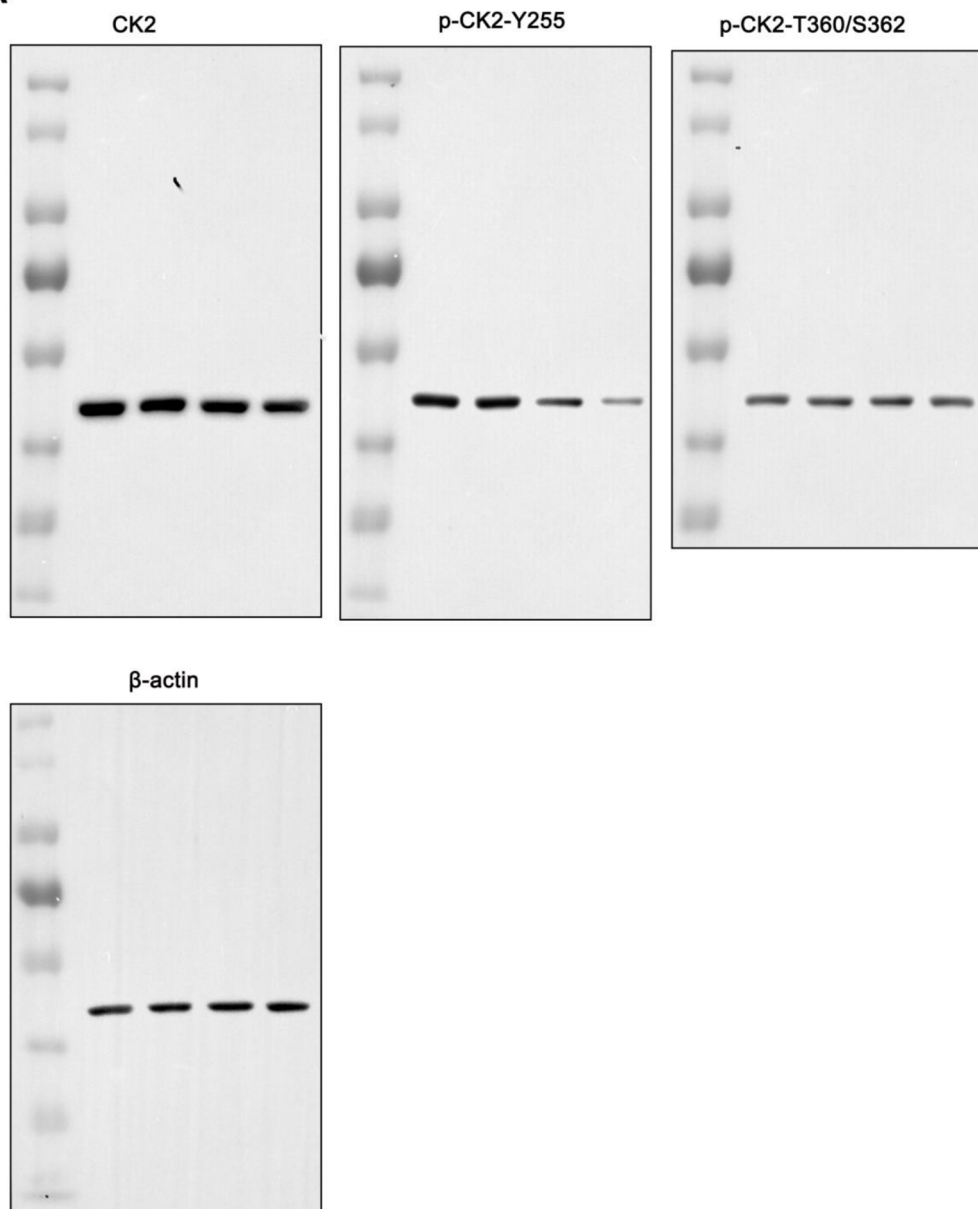

Supplementary Figure S4. Representative full-gel images of Western blots in Figure 5A.

**Fig. 6A**

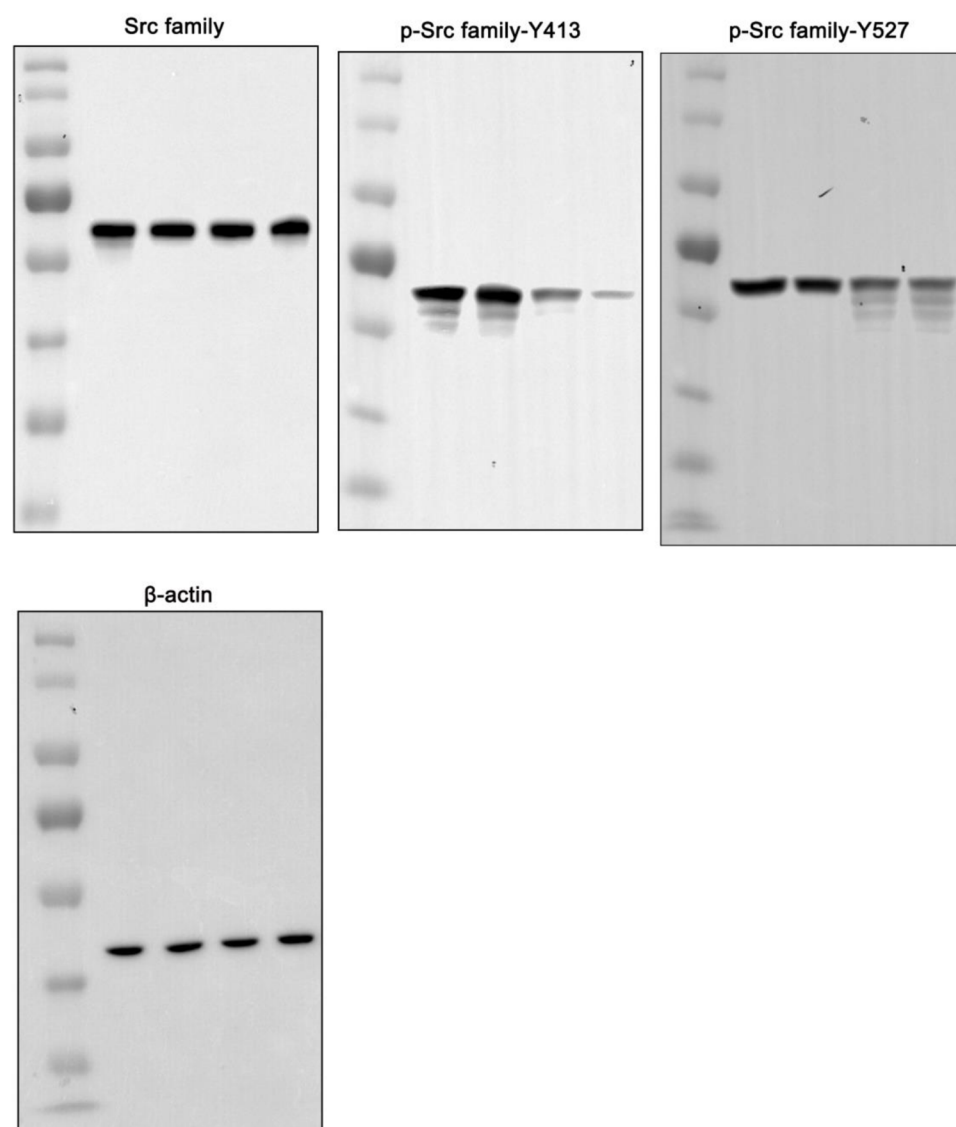

Supplementary Figure S5. Representative full-gel images of Western blots in Figure 6A
